# Supplementary material for: Human endotrophin as a driver of malignant tumor growth
Source: JCI journal article supplement (doi:10.1172/jci.insight.125094), 2019-03-21
Supplement: sd1 [file 1]

# SUPPLEMENTAL DATA

## Human Endotrophin as a Driver of Malignant Tumor Growth

Dawei Bu<sup>1</sup>, Clair Crewe<sup>1</sup>, Christine M. Kusminski<sup>1</sup>, Ruth Gordillo<sup>1</sup>, Alexandra L. Ghaben<sup>1</sup>, Min Kim<sup>1,#</sup>, Jiyoung Park<sup>1,#</sup>, Hui Deng<sup>2</sup>, Wei Xiong<sup>2</sup>, Xiao-Zheng Liu<sup>3</sup>, Per Eystein Lønning<sup>4</sup>, Nils Halberg<sup>3</sup>, Adan Rios<sup>2,5</sup>, Yujun Chang<sup>6</sup>, Anneliese Gonzalez<sup>2,5</sup>, Ningyan Zhang<sup>2</sup>, Zhiqiang An<sup>2,\*</sup> and Philipp E. Scherer<sup>1,\*</sup>

<sup>1</sup>Touchstone Diabetes Center, Departments of Internal Medicine and Simmons Cancer Center, The University of Texas Southwestern Medical Center; Dallas, TX, USA.

<sup>2</sup>Texas Therapeutics Institute; Brown Foundation Institute of Molecular Medicine; University of Texas Health Science Center at Houston; Houston, TX, USA.

<sup>3</sup>Department of Biomedicine, University of Bergen, Bergen, Norway

<sup>4</sup>Department of Clinical Science, Faculty of Medicine, University of Bergen, and Department of Oncology, Haukeland University Hospital, Bergen, Norway

<sup>5</sup>Division of Oncology, Department of Internal Medicine, University of Texas Health Science Center at Houston; Houston, TX, USA

<sup>6</sup>Panamab, Houston, TX 77021

#current address: Department of Biological Sciences, School of Life Sciences, Ulsan National Institute of Science and Technology, Ulsan, South Korea

**Supplemental Figure 1.** Standard curves (**A**, **B**) show sensitivity and linear dose response to endotrophin concentrations. Comparison of a tissue stain (**C**, **D**) with antibody ETPmAb4 with and without antigen pre-adsorption to demonstrate specific antigen staining. **E-H**: Col6a3 expression in pre- and post-menopausal tumors, and different tumor subtypes. The data shown in Figure 1 (all patients) was subdivided into pre- (**E**) and post-menopausal breast cancer (**F**), or into estrogen receptor positive (**G**) and estrogen receptor negative subpopulations (**H**).

**Supplemental Figure 2.** (**A**) ZR-75-1 breast cancer cells ( $5 \times 10^5$  cells), n=3. (**B**) MCF-7 breast cancer cells ( $5 \times 10^5$  cells). n=3. (**C**) MDAMB-231 breast cancer cells ( $5 \times 10^5$  cells), n=3, were plated into 6-well plates and treated with endotrophin (0.1 ug/mL) three times (every other day). Total RNA was then extracted from each well. The EMT marker genes *Twist*, *Snail*, *Cdh2* and *Cdh1* were determined by qRT-PCR, then normalized to GAPDH. (**D**) MCF-7 cells (40,000 cells), n=4. (**E**) ZR-75-1 cells (40,000 cells), n=4. (**F**) MDAMB-453 cells (40,000 cells), n=4. (**G**) MDAMB-231 (40,000 cells), n=4, were plated into 24-well plates. When the cells reached 90% confluence, the monolayer was scratched with a 1 mL pipette tip to create 2 perpendicular straight lines across the center of the well. Cells were then treated with increasing concentrations of endotrophin (0.1 ug/mL). Images were obtained using a Nikon Cool Scope microscope (Nikon) after a 48 hr incubation. Migrating cell numbers were evaluated using ImageJ software. (**H**) MCF-7 cells ( $5 \times 10^5$  cells), n=4. (**I**) ZR-75-1 cells ( $5 \times 10^5$  cells), n=4. (**J**) MDAMB-453 cells ( $5 \times 10^5$  cells), n=4. (**K**) MDAMB-231 cells ( $5 \times 10^5$  cells), n=4, were plated in the top chamber of a trans-well plate. Endotrophin (0.1 ug/mL) was then added with or without

1% FBS in the lower chamber, then incubated for 16 hrs. Images were then obtained on a Nikon Cool Scope microscope (Nikon) after a 16 hr incubation. In all cases, data was represented as mean  $\pm$  SEM, and statistical significance ( $***p<0.0001$ ) was calculated using unpaired, two-tailed *t-test w/Holm-Sidak correction for multiple comparisons*.

**Supplemental Figure 3. Screening for rabbit monoclonal antibodies.** MCF-7 breast cancer cells (20,000 cells) were plated into a 96-well plate. Cells were then treated with 10  $\mu$ m of cisplatin and 100 ng/mL of endotrophin. All 132 neutralized endotrophin antibodies were screened. Cell survival was measured using a CellTiter One Solution Cell Proliferation Assay.

**Supplemental Figure 4.** SC macrophage cells (50,000 cells) were seeded at the top of a chamber. Then 100 ng/mL of endotrophin was added with 1% FBS in the bottom chamber. Next, 10 ug/mL of anti-ETP antibodies (#1, #2, #4, #6, #10, #11 and #72) were added to the bottom chamber, and incubated for 2 hr. Migrated cells were counted after 2 hr. Data was represented as mean  $\pm$  SEM,  $n=4$  and statistical significance ( $***P<0.0001$ ) was calculated using unpaired, two-tailed *t-test w/Holm-Sidak correction for multiple comparisons*.

**Supplemental Figure 5. (A)** H&E staining and endomucin immunofluorescence staining from CTRL Ab and #4 Ab-treated ETP transfected MCF-7 tumors. Scale bars: 50 $\mu$ m. **(B)** Mac2 immunofluorescence staining for tumor tissues from CTRL Ab and #4 Ab-treatment ETP transfected MCF-7 tumors. Scale bars: 50 $\mu$ m. **(C)** E-CAD immunofluorescence

staining for tumor tissues from CTRL Ab and #4 Ab-treatment ETP transfected MCF-7 tumors. The last panel for each marker reflects a stain with DAPI. Scale bars: 50µm.

**Supplemental Figure 6. (A)** H&E staining and endomucin immunofluorescence staining from CTRL Ab and #4 Ab-treatment MDAMB-231 tumors. Scale bars: 50µm. **(B)** Mac2 immunofluorescence staining for tumor tissues from CTRL Ab and #4 Ab treatment MDAMB-231 tumors. Scale bars: 50µm. **(C)** E-CAD immunofluorescence staining for tumor tissues from CTRL Ab and #4 Ab-treatment MDAMB-231 tumors. The last panel for each marker reflects a stain with DAPI. Scale bars: 50µm.

**Supplemental Figure 7.** Kinetics of the rabbit parental antibody ENTmAb4 (left) and the humanized version hENTmAb4 (right) were assessed using an Octet RED96.



**A**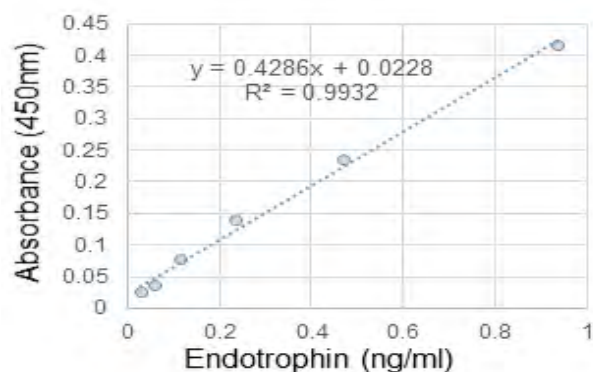**B**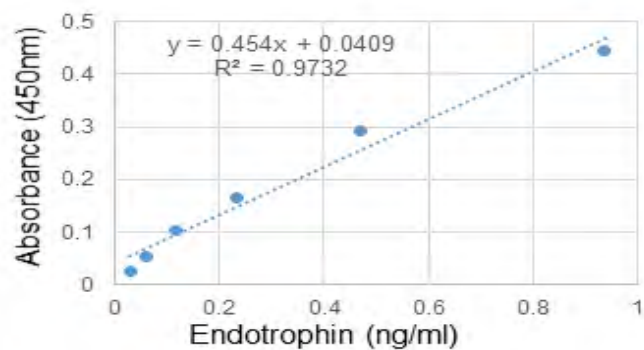**C**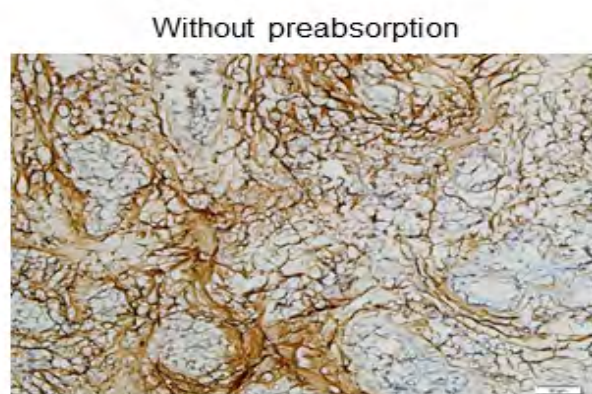**D**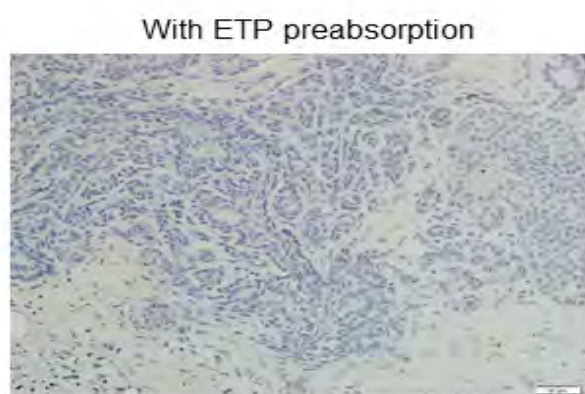**E**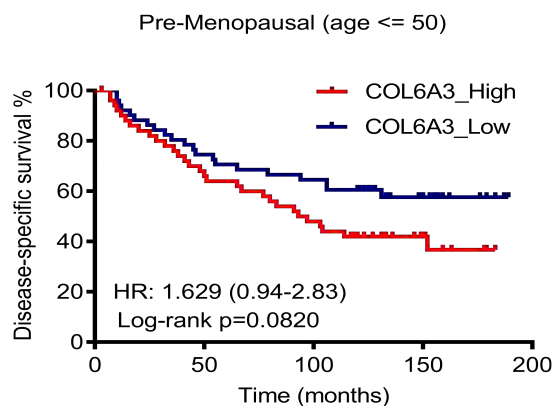**F**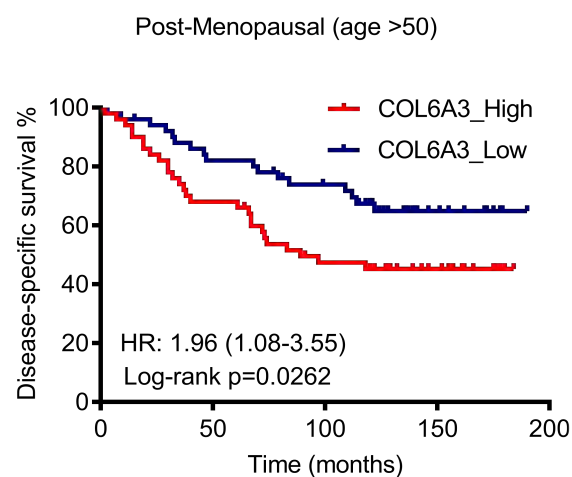**G**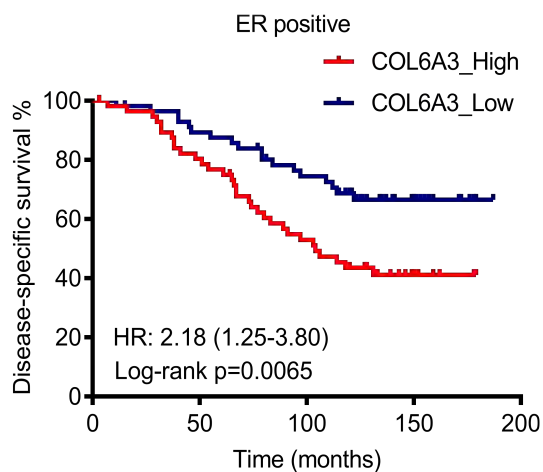**H**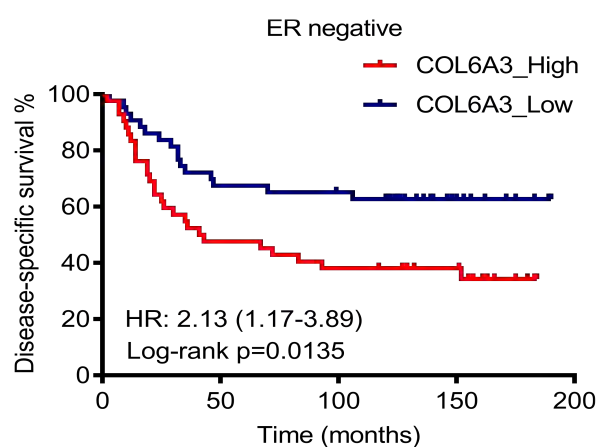

**A**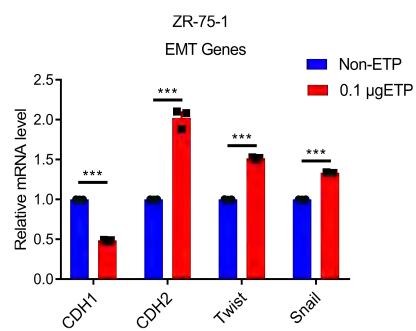**B**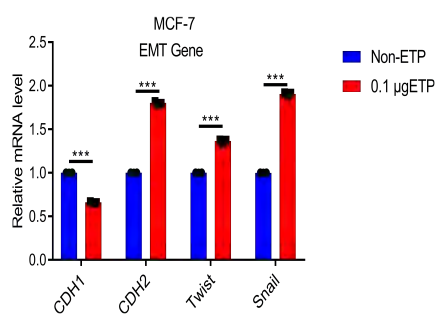**C**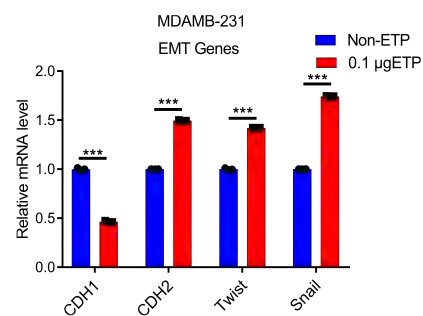**D**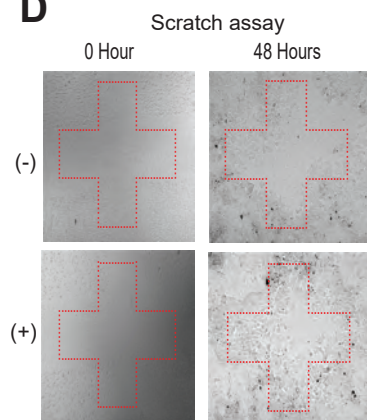**E**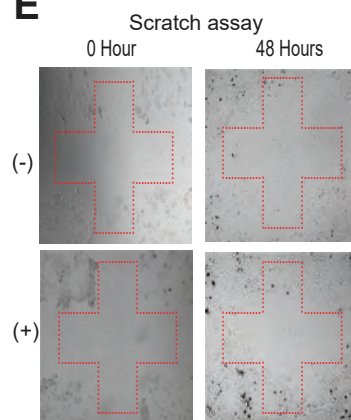**F**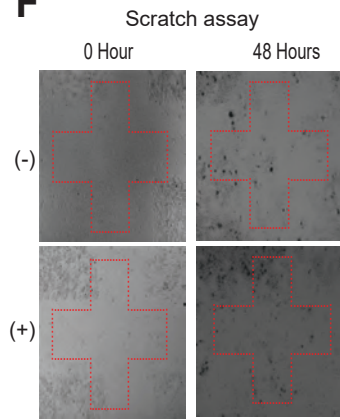**G**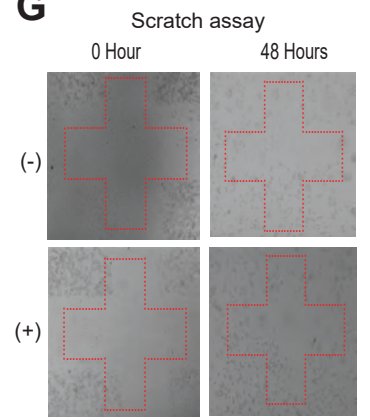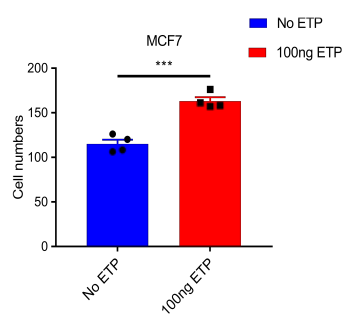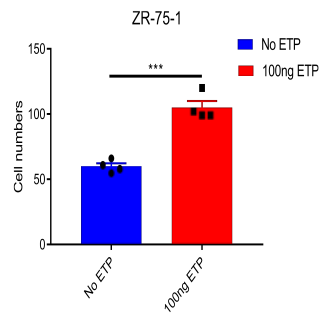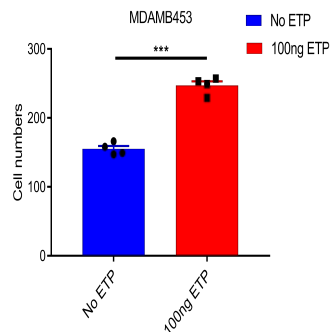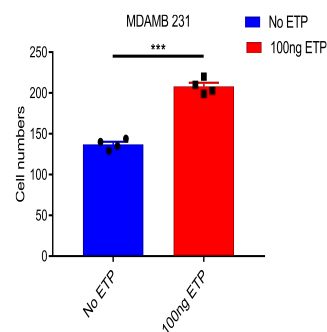**H**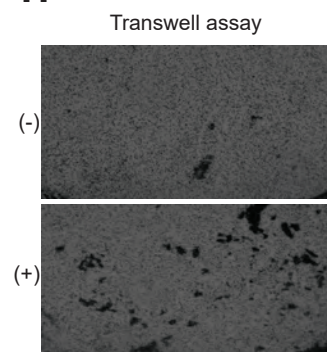**I**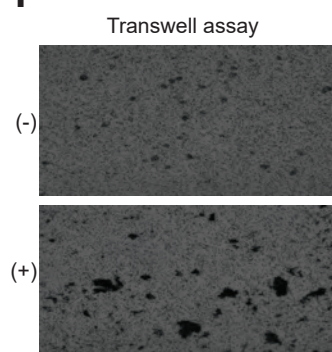**J**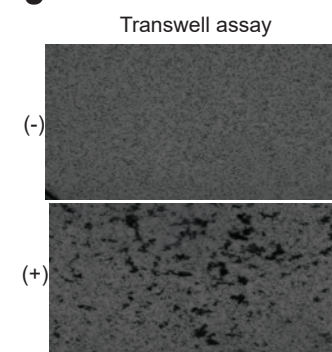**K**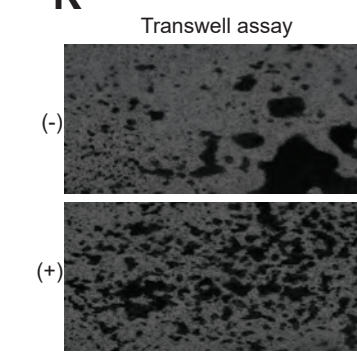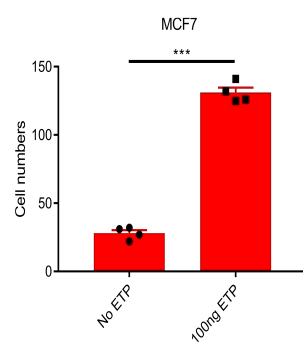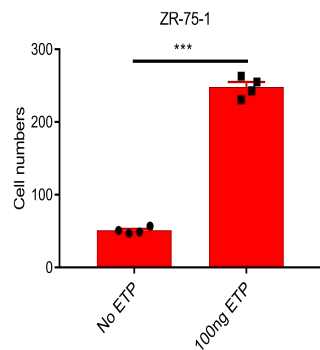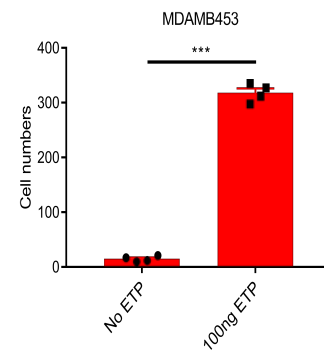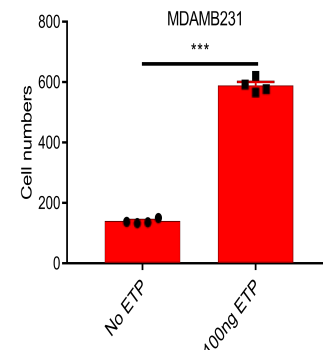

MTS assay screening ETP antibody

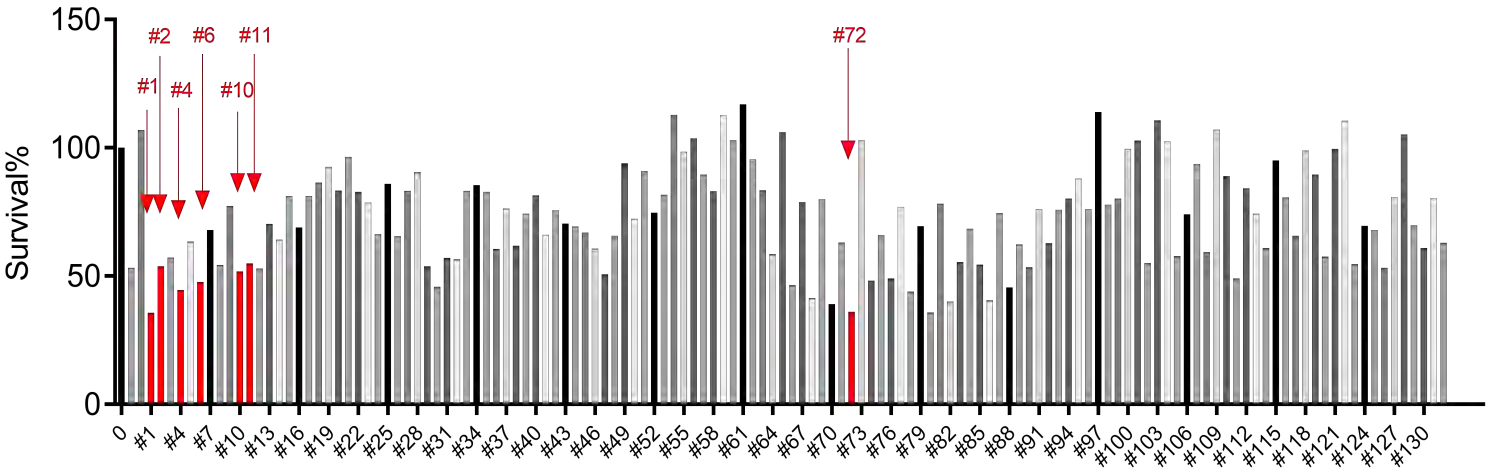

Transwell assay

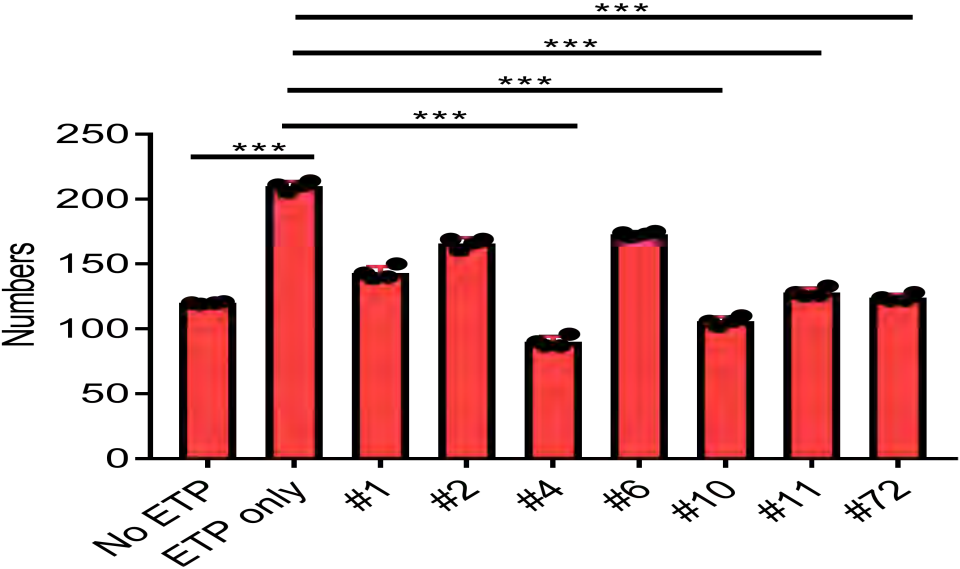



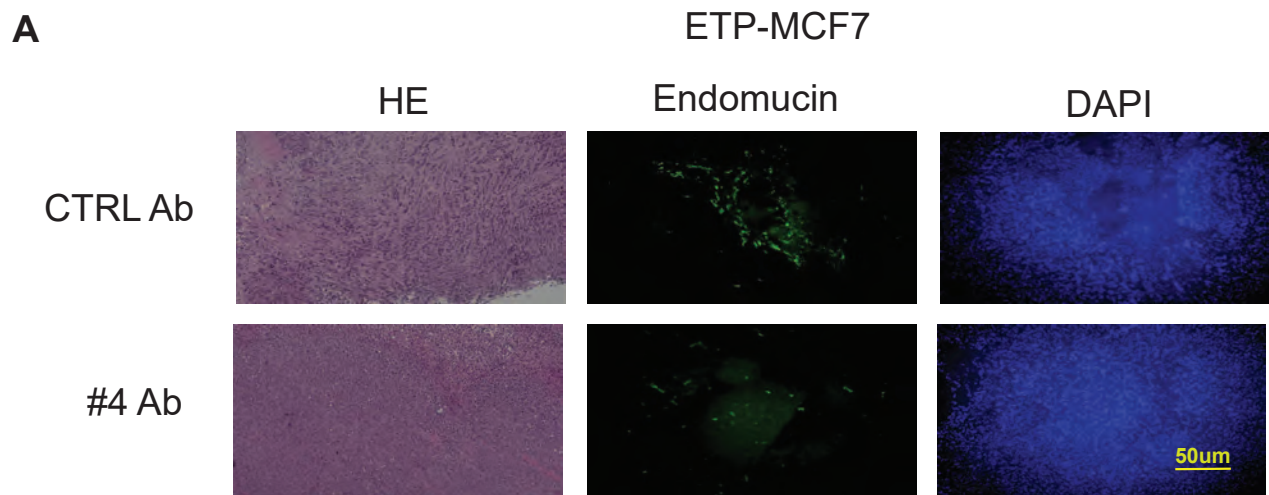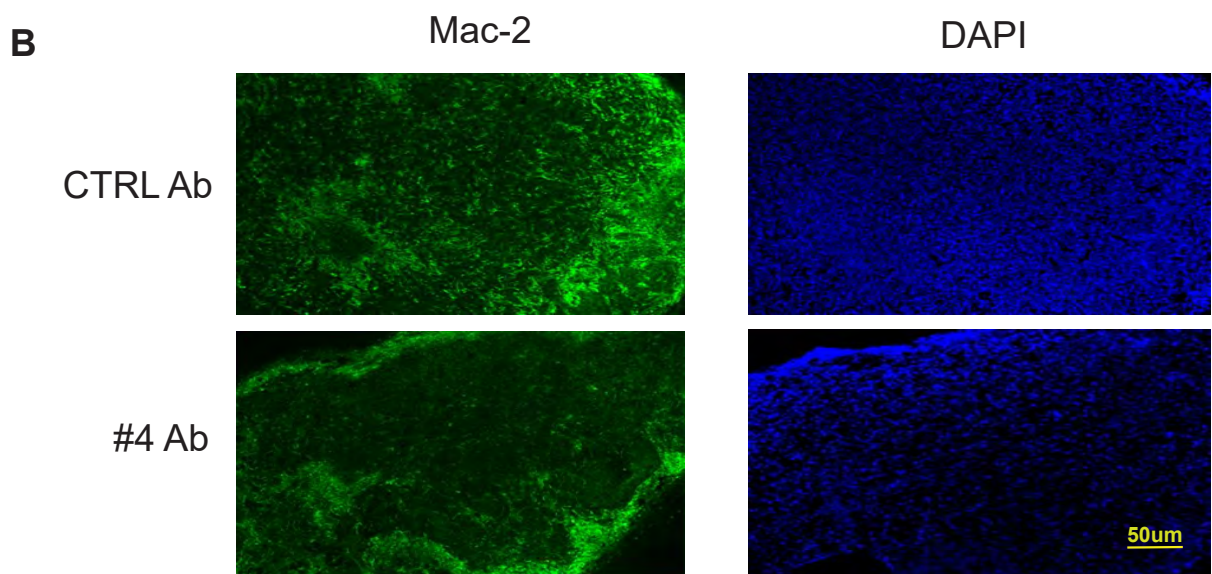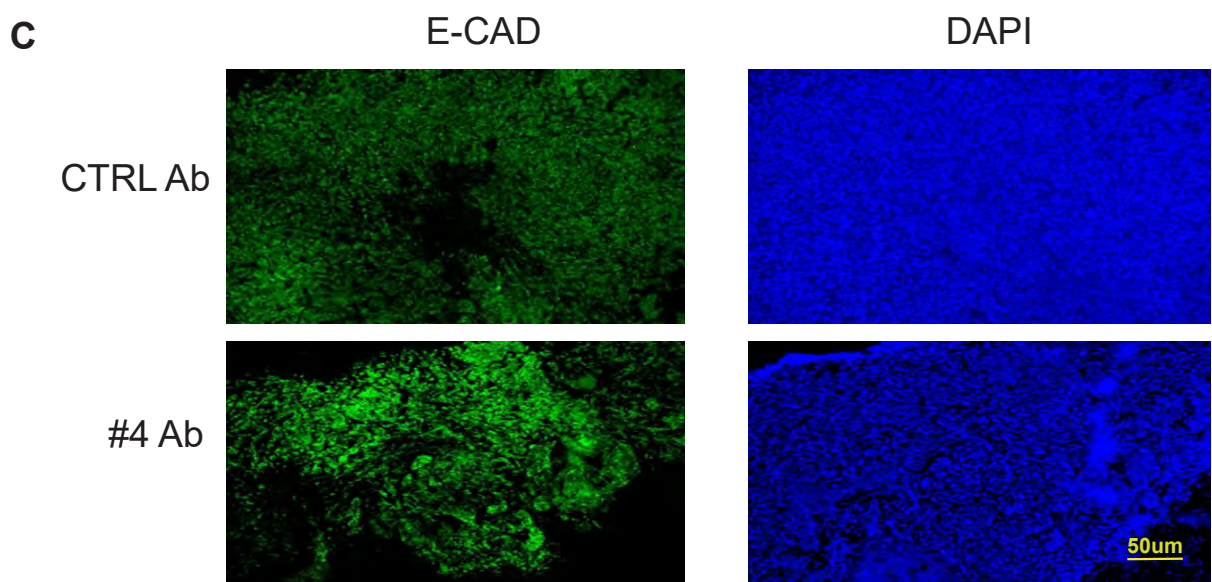

**A**

MDAMB-231

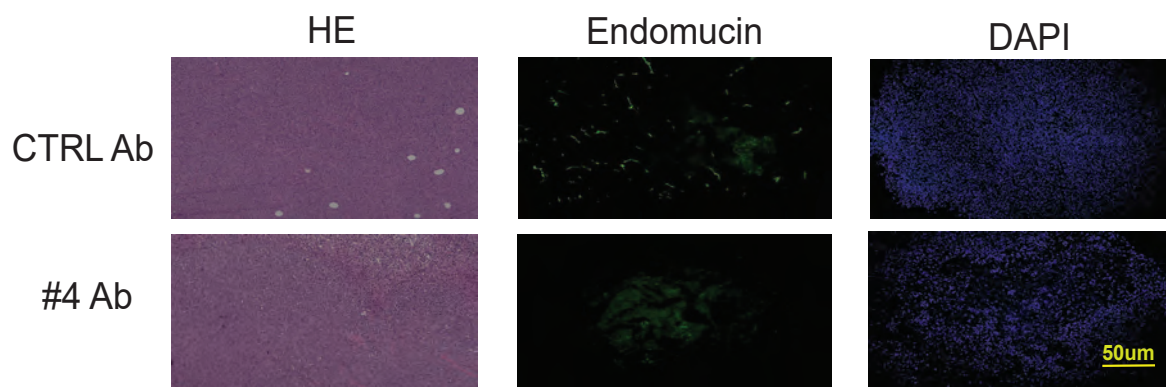**B**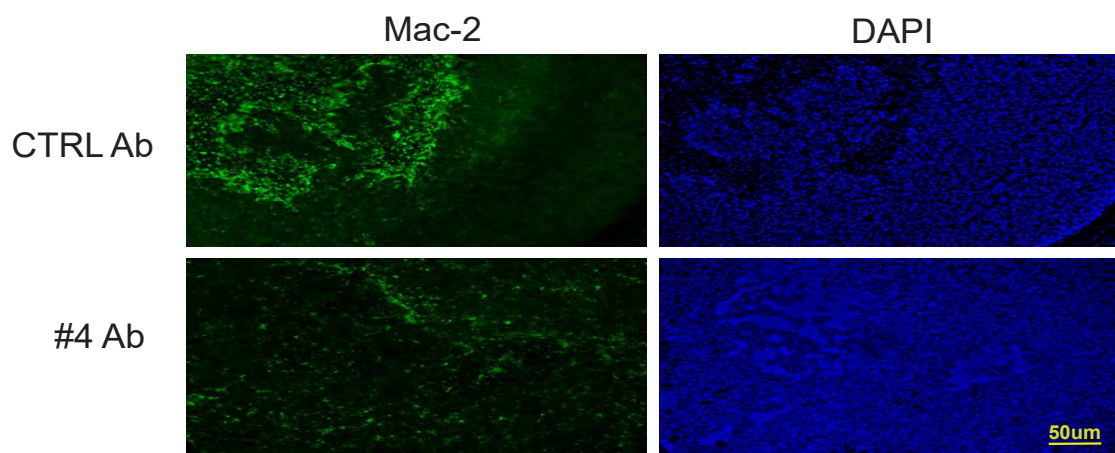**C**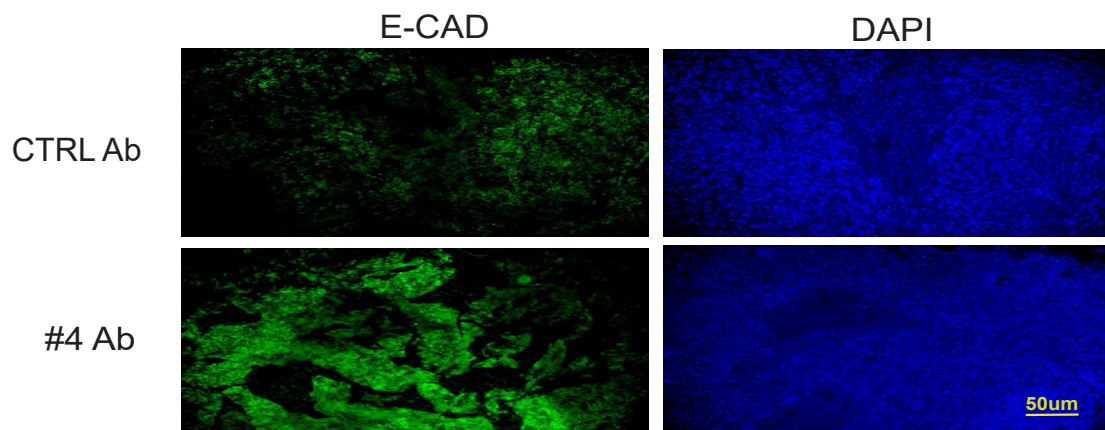

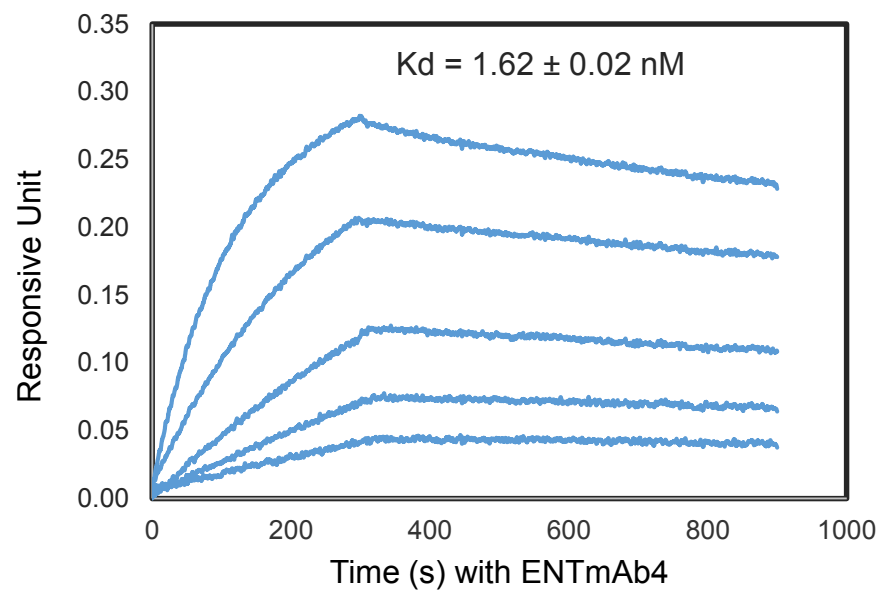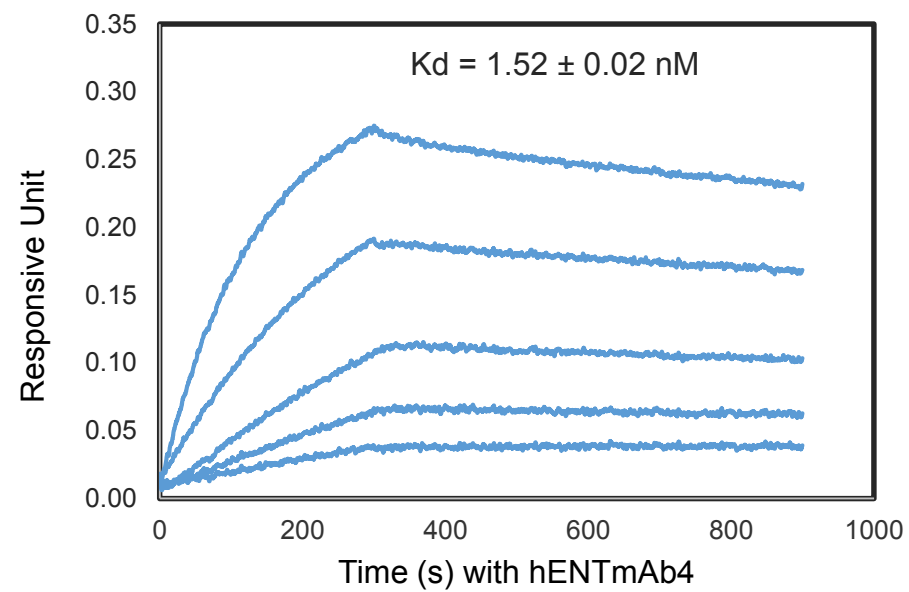

| Antibody | KD (M)   | KD Error | kon(1/Ms) | kdis(1/s) | Full X <sup>2</sup> | Full R <sup>2</sup> |
|----------|----------|----------|-----------|-----------|---------------------|---------------------|
| ENTmAb4  | 1.62E-09 | 1.70E-11 | 1.65E+05  | 2.67E-04  | 0.0654              | 0.9978              |
| hENTmAb4 | 1.52E-09 | 1.51E-11 | 1.51E+05  | 2.30E-04  | 0.0414              | 0.9985              |
